# Supplementary material for: Malaria Public Health Status: Global Context and Update on Gulf Cooperation Council Countries
Source: Preprints.org preprint supplement (doi:10.20944/preprints202407.2174.v1), 2024-07-26
Supplement: Supplementary file 1 [file supplementary]

Supplementary Material

Malaria Public Health Status:

Global Context and Update on Gulf Cooperation Council Countries

Tanveer Ahmad1, Bushra A. Alhammadi1, Shaikha Y. Almaazmi1, Sahar Arafa1, Gregory L. Blatch1,2,*, Tanima Dutt3, Jason E. Gestwicki4, Robert A. Keyzers5, Aisha Meskiri6, Ahmed Sharafeldin1, Addmore Shonhai7, and Harpreet Singh8

1Faculty of Health Sciences, Higher Colleges of Technology, Sharjah, United Arab Emirates

2Biomedical Biotechnology Research Unit, Department of Biochemistry and Microbiology, Rhodes University, Grahamstown, South Africa

3Department of Diagnostic Genomics, Path West Nedlands, QEII Medical Centre, WA, Australia

4Department of Pharmaceutical Chemistry and the Institute for Neurodegenerative Diseases, University of California San Francisco, San Francisco, CA, USA

5Centre for Biodiscovery & School of Chemical and Physical Sciences, Victoria University of Wellington, Wellington, New Zealand

6Faculty of Health Sciences, Higher Colleges of Technology, Abu Dhabi, United Arab Emirates

7Department of Biochemistry, University of Venda, Thohoyandou, South Africa

8Department of Bioinformatics, Hans Raj Mahila Maha Vidyalaya, Jalandhar, Punjab, India

*** Correspondence:**Gregory L. Blatch
g.blatch@ru.ac.za

**Table S1: Malaria Patient Data for the United Arab Emirates (2009-2021)†**

| **Year** | **Emirate** | **Number of Patients** | |
| --- | --- | --- | --- |
| **2009** | Abu Dhabi | 1393 |  |
| Dubai | 797 |
| Sharjah | 597 |
| Ajman | 41 |
| Umm Al Quwain | 11 |
| Ras Al Khaima | 125 |
| Fujairah | 31 |
| **SUB-TOTAL** |  | **2995** |
| **2010** | Abu Dhabi | 1449 |  |
| Dubai | 834 |
| Sharjah | 731 |
| Ajman | 40 |
| Umm Al Quwain | 12 |
| Ras Al Khaima | 101 |
| Fujairah | 43 |
| **SUB-TOTAL** |  | **3210** |
| **2011** | Abu Dhabi | 2731 |  |
| Dubai | 1161 |
| Sharjah | 970 |
| Ajman | 76 |
| Umm Al Quwain | 20 |
| Ras Al Khaima | 158 |
| Fujairah | 59 |
| **SUB-TOTAL** |  | **5175** |
| **2012** | Dubai | 1051 |  |
| Sharjah | 992 |
| Ajman | 73 |
| Umm Al Quwain | 15 |
| Ras Al Khaima | 214 |
| Fujairah | 41 |
| **SUB-TOTAL** |  | **2386** |
| **2013** | Dubai | 970 |  |
| Sharjah | 848 |
| Ajman | 93 |
| Umm Al Quwain | 22 |
| Ras Al Khaima | 148 |
| Fujairah | 53 |
| **SUB-TOTAL** |  | **2134** |
| **2014** | Dubai | 918 |  |
| Sharjah | 889 |
| Umm Al Quwain | 31 |
| Ras Al Khaima | 138 |
| Fujairah | 52 |
| **SUB-TOTAL** |  | **2028** |
| **2015** | Dubai | 717 |  |
| Sharjah | 698 |
| Ajman | 96 |
| Umm Al Quwain | 22 |
| Ras Al Khaima | 121 |
| Fujairah | 50 |
| **SUB-TOTAL** |  | **1704** |

| **2016** | Abu Dhabi | 1006 |  |
| --- | --- | --- | --- |
| Dubai | 826 |
| Sharjah | 491 |
| Ajman | 363 |
| Umm Al Quwain | 35 |
| Ras Al Khaima | 32 |
| Fujairah | 35 |
| **SUB-TOTAL** |  | **2788** |
| **2017** | Dubai | 707 |  |
| Sharjah | 978 |
| Ajman | 85 |
| Umm Al Quwain | 26 |
| Ras Al Khaima | 197 |
| Fujairah | 117 |
| **SUB-TOTAL** |  | **2110** |
| **2018** | Abu Dhabi | 1429 |  |
| Dubai | 866 |
| Sharjah | 629 |
| Ajman | 75 |
| Umm Al Quwain | 12 |
| Ras Al Khaima | 118 |
| Fujairah | 109 |
| **SUBTOTAL** |  | **3238** |
| **2019** | Abu Dhabi | 1144 |  |
| Dubai | 835 |
| Sharjah | 633 |
| Ajman | 62 |
| Umm Al Quwain | 23 |
| Ras Al Khaima | 89 |
| Fujairah | 95 |
| **SUB-TOTAL** |  | **2881** |
| **2020** | Abu Dhabi | 427 |  |
| Dubai | 237 |
| Sharjah | 171 |
| Ajman | 20 |
| Umm Al Quwain | 14 |
| Ras Al Khaima | 26 |
| Fujairah | 20 |
| **SUB-TOTAL** |  | **915** |
| **2021** | Abu Dhabi | 355 |  |
| Dubai | 400 |
| Sharjah | 154 |
| Ajman | 38 |
| Umm Al Quwain | 19 |
| Ras Al Khaima | 26 |
| Fujairah | 22 |
| **SUB-TOTAL** |  | **1014** |
| **TOTAL** |  |  | **32578** |

†Ministry of Health and Prevention; https://mohap.gov.ae/en/open-data/mohap-open-data
